# Supplementary material
Source: PubMed Central journal article supplement (PMC5088104)
Supplement: NIHMS825339-supplement-01.pdf [file NIHMS825339-supplement-01.pdf]

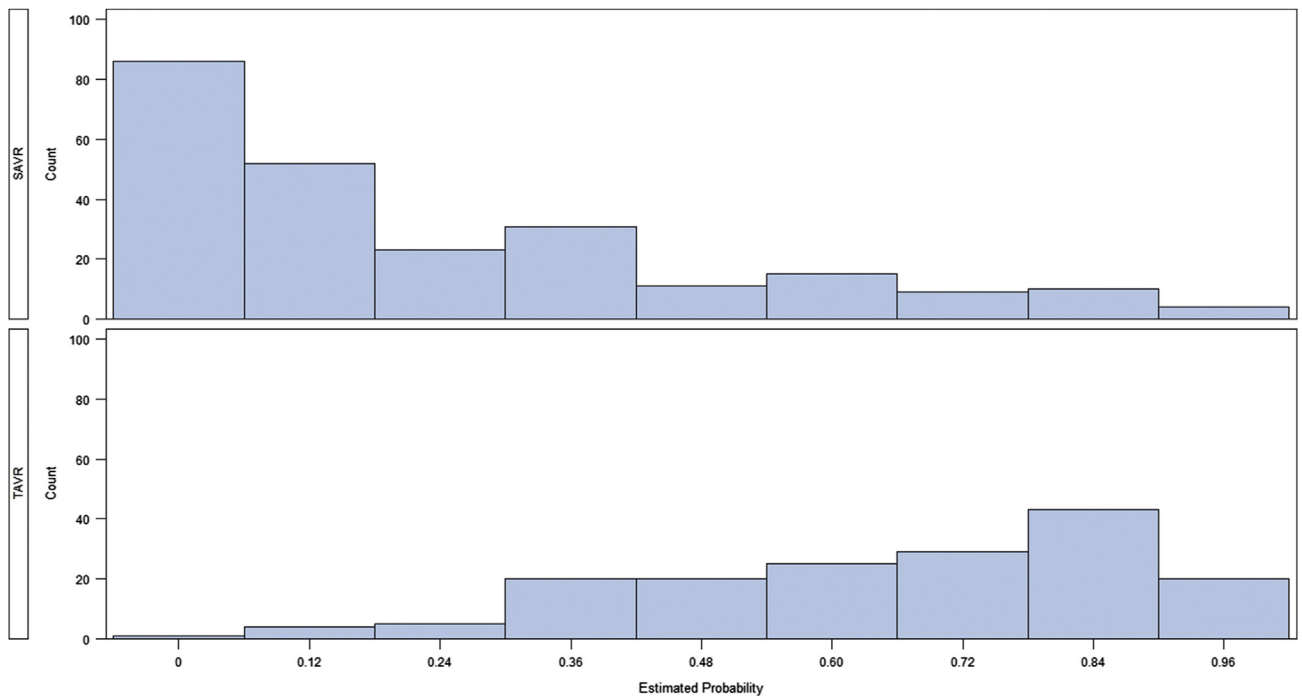

**FIGURE E1.** Covariate balance showing the standardized difference between transcatheter aortic valve replacement (*TAVR*) and surgical aortic valve replacement (*SAVR*) before and after propensity score matching.

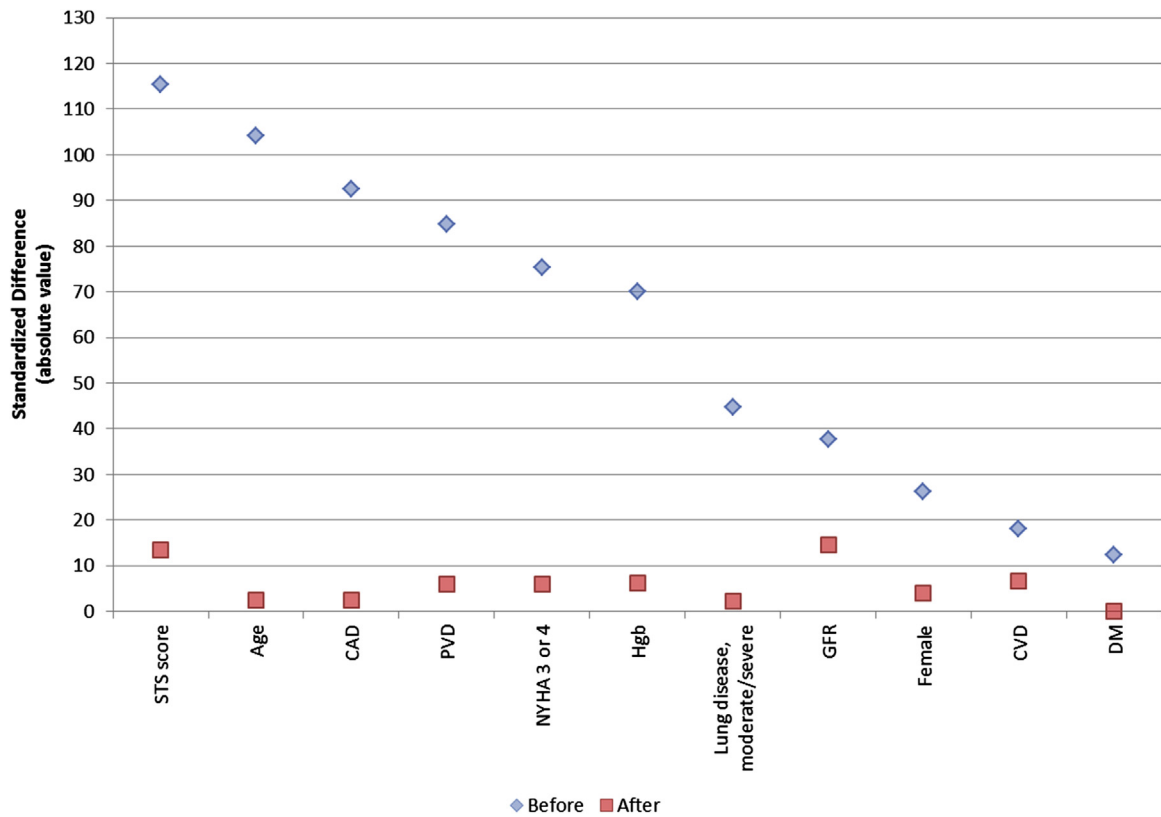

**FIGURE E2.** Distribution of propensity scores before matching to evaluate overlap. *STS*, Society of Thoracic Surgeons; *CAD*, coronary artery disease; *PVD*, peripheral vascular disease; *NYHA*, New York Heart Association, *Hgb*, hemoglobin; *GFR* glomerular filtration rate, *CVD*, cerebrovascular disease; *DM*, diabetes mellitus.

**TABLE E1. Kaplan-Meier estimates of mortality among patients undergoing transcatheter aortic valve replacement (TAVR) and surgical aortic valve replacement (SAVR)**

| AVR type | Time from implant | Without delirium |                         | With delirium |                         | P value |
|----------|-------------------|------------------|-------------------------|---------------|-------------------------|---------|
|          |                   | Survival %       | 95% Confidence interval | Survival %    | 95% Confidence interval |         |
| TAVR     | 30 d              | 98.3             | 93.4-99.6               | 87.8          | 74.8-94.3               | .029    |
|          | 6 mo              | 89.5             | 82.2-93.9               | 79.1          | 64.7-88.2               | .110    |
|          | 1 y               | 80.4             | 71.1-87.0               | 66.4          | 50.0-78.5               | .090    |
| SAVR     | 30 d              | 1.00             | 1.00-1.00               | 95.3          | 88.1-98.2               | .041    |
|          | 6 mo              | 98.8             | 95.4-99.7               | 88.4          | 79.4-93.6               | .003    |
|          | 1 y               | 97.3             | 92.7-99.0               | 82.8          | 72.6-89.5               | .001    |

AVR, Aortic valve replacement; TAVR, transcatheter aortic valve replacement; SAVR, surgical aortic valve replacement.

**000 Delirium after surgical and transcatheter aortic valve replacement is associated with increased mortality**

*Hersh S. Maniar, MD, Brian R. Lindman, MD, Krisztina Escallier, MD, Michael Avidan, MD, Eric Novak, MS, Spencer J. Melby, MD, Marci S. Damiano, RN, MSN, John Lasala, MD, Nishath Quader, MD, Ravinder Singh Rao, MD, Jennifer Lawton, MD, Marc R. Moon, MD, Daniel Helsten, MD, Michael K. Pasque, MD, Ralph J. Damiano, Jr, MD, and Alan Zajarias, MD, St Louis, Mo*

Delirium after surgical and transcatheter aortic valve replacement is associated with increased mortality.
